# Supplementary material for: Causal evidence between monsoon and evolution of rhizomyine rodents
Source: PubMed Central journal article supplement (PMC4355670; doi:10.1038/srep09008), 2015-03-11

1 **SUPPORTING INFORMATION**

2 **Causal evidence between monsoon and evolution of**  
3 **rhizomyine rodents**

4 **Raquel López-Antoñanzas<sup>1,3\*</sup>, Fabien Knoll<sup>1,2,3</sup>, Shiming Wan<sup>4</sup> & Lawrence**  
5 **J. Flynn<sup>5</sup>**

6  
7 <sup>1</sup>School of Earth Sciences, University of Bristol, Bristol, United Kingdom, <sup>2</sup>School of Earth,  
8 Atmospheric & Environmental Sciences, University of Manchester, Manchester, United Kingdom,  
9 <sup>3</sup>Departamento de Paleobiología, Museo Nacional de Ciencias Naturales-CSIC, Madrid, Spain, <sup>4</sup>Key  
10 Laboratory of Marine Geology and Environment, Institute of Oceanology-Chinese Academy of  
11 Science, Qingdao, China, <sup>5</sup> Department of Human Evolutionary Biology, Harvard University,  
12 Cambridge, USA

13

14 **Supplementary Figure 1 | Paleobiogeographic patterns in extant and fossil rhizomyine**  
15 **rodents.** Each terminal taxon and every node is given a circled number. The area of  
16 occurrence (from 1 to 4) is numbered beside each, where 1=Asia, 2=Indian subcontinent, 3=N  
17 Africa, and 4=E Africa. Mapping the geographic states to the ancestral nodes using phases  
18 one and two of Fitch<sup>77</sup> optimization suggests that there have been several events of range  
19 expansion and contraction (denoted by D and V, respectively) during the evolutionary history  
20 of the group (see text).

21

22 **Supplementary Table 1 | Rate calculations. Instantaneous per-capita and deterministic**  
23 **rates calculated as described in the “Material and methods” section.** Raw observed  
24 turnover data include only the observed stratigraphic ranges of species, while  
25 phylogenetically constrained data incorporate ghost ranges. Rates are calculated from species  
26 turnover data to the left of the rate columns.  $\Delta t$  is the temporal duration of the interval  
27 determined from the 2013 chronostratigraphic chart<sup>74</sup>. NbL indicates the number of species  
28 that cross the lower interval boundary, but become extinct during the interval, Nf indicates  
29 the number of species that originate within the interval and traverse the upper interval  
30 boundary, Nbt indicates the number of species that cross both the upper and lower interval  
31 boundaries.  $N_0$  indicates the number of species that are extant at the beginning of the interval  
32 of time  $t_n$ , Nf indicates the number of species that survive the end of  $t_n$ , # sp indicates the  
33 number of speciation events that occur during that interval, # ext indicates the number of  
34 species that experience extinction during it.

35

Supplementary Figure 1

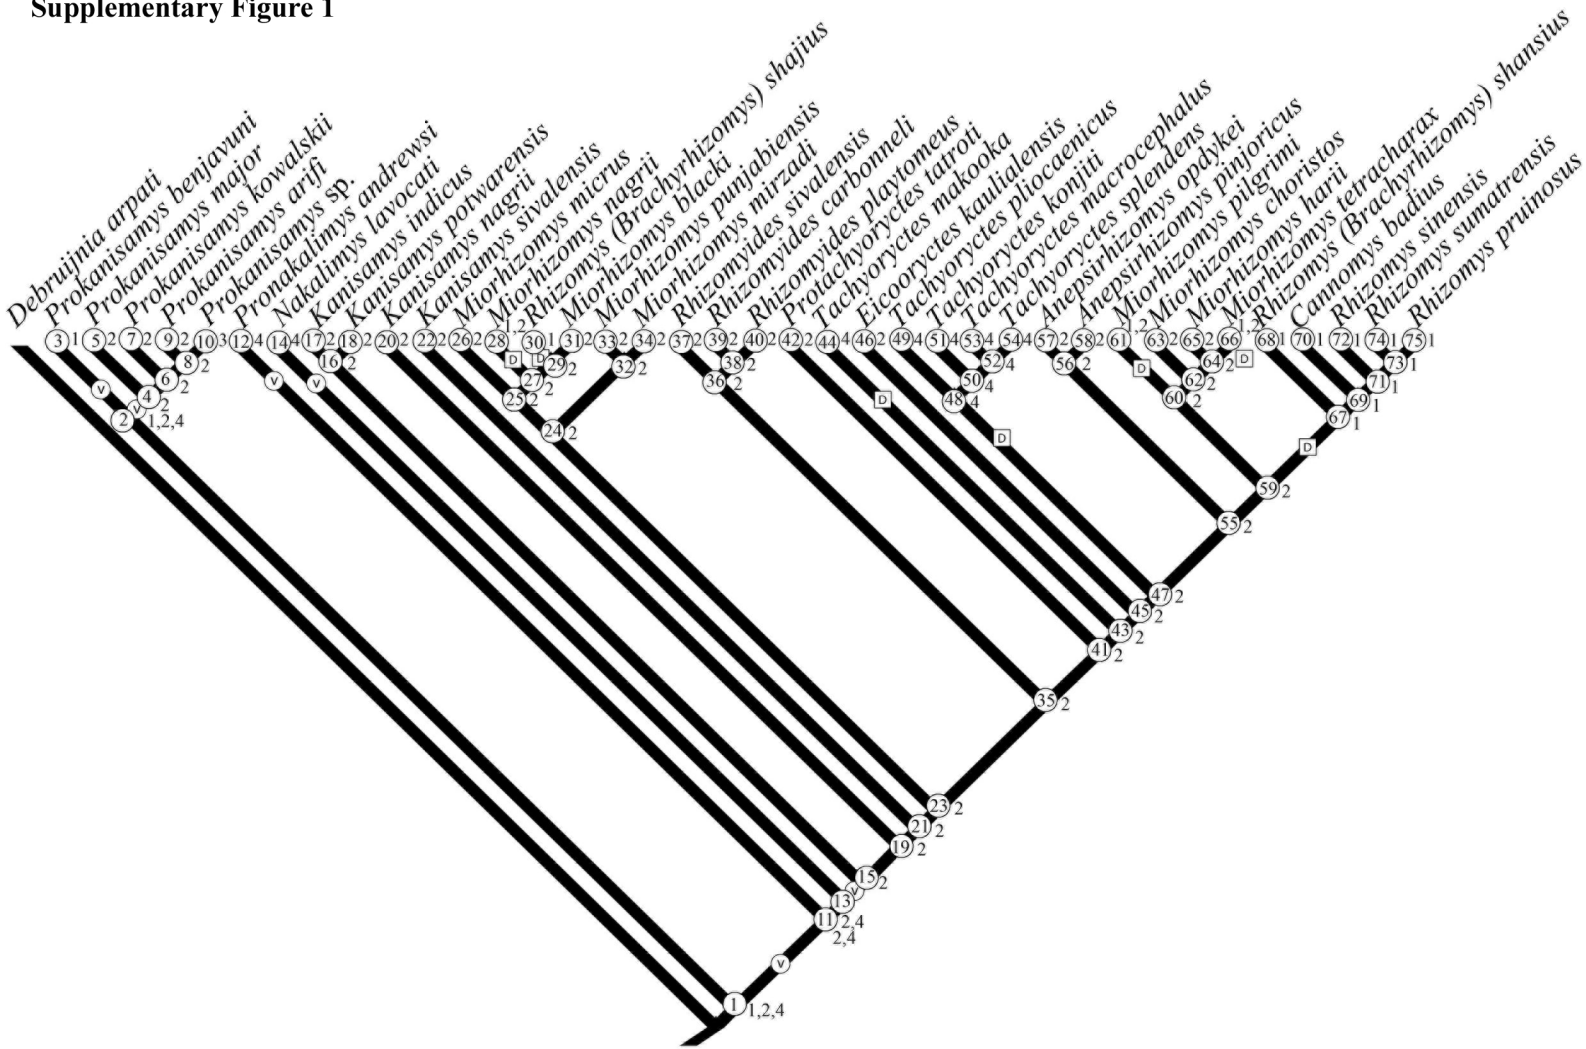

Supplement: srep09008-s1.pdf [file srep09008-s1.pdf]
